# Supplementary material for: Comparison of error correction algorithms for Ion Torrent PGM data: application to hepatitis B virus
Source: PubMed Central journal article supplement (PMC5556038; doi:10.1038/s41598-017-08139-y), 2017-08-14
Supplement: 41598_2017_8139_MOESM1_ESM.pdf [file 41598_2017_8139_MOESM1_ESM.pdf]

# **Comparison of error correction algorithms for Ion Torrent PGM data: application to hepatitis B virus**

Liting Song<sup>1,3</sup>, Wenxun Huang<sup>1,3</sup>, Juan Kang<sup>1,3</sup>, Yuan Huang<sup>2</sup>, Hong Ren<sup>1</sup>, Keyue Ding<sup>1,\*</sup>

<sup>1</sup>Key Laboratory of Molecular Biology for Infectious Diseases (Ministry of Education), Institute for Viral Hepatitis, Department of Infectious Diseases, The Second Affiliated Hospital, Chongqing Medical University, Chongqing, 400010 P.R. China

<sup>2</sup>Center for hepatobiliary and pancreatic diseases, Beijing Tsinghua Changgung Hospital, Medical Center, Tsinghua University, Beijing, 100044 P.R. China

<sup>3</sup>These authors contributed equally

\*: Corresponding author

Keyue Ding, Ph.D.

74# Linjiang Men, Yuzhong District, Chongqing, 400010 P.R. China

Phone: +86 23 6389 2759

E-mail: dingkeyue@hospital.cqmu.edu.cn

## Supplementary Information

### Supplementary materials and methods

1. Generation of Target Error Format (TEF) file. We used 'sam-analysis.py' in Error Correction Evaluation (ECE) Toolkit<sup>1</sup> to generate this file.

```
python sam-analysis.py --file=${sam file} --outfile=${output file} --ambig=${ambig output} --unmapped=${unmapped file} --trim=${trim file} --genome=${reference genome}
```

- `${sam file}`: the TMAP mapping sam file without error correction
- `${output file}`: mapping reads
- `${ambig output}`: ambiguous reads
- `${unmapped file}`: unmapped reads
- `${trim file}`: trimming reads

2. Data simulation. We used the Customized Read Simulator (CuReSim, ver.1.2, <http://www.pegase-biosciences.com/curesim-a-customized-read-simulator/>)<sup>2</sup> for simulating Ion Torrent PGM data.

```
java -Xmx20480m -jar CuReSim.jar -f ${reference} -m ${mean of read lengths} -sd ${sd of read lengths} -d ${deletion rate} -i ${insertion rate} -s ${substitution rate} -n ${read number}
```

- `${mean of read lengths}` and `${sd of read lengths}`: the mean (267) and standard deviation of read lengths (85)
- `${deletion rate}`: deletion error rate
- `${insertion rate}`: insertion error rate
- `${substitution rate}`: substitution error rate

3. Use of error-correction algorithms. We used uniform parameter values for the five error correction softwares. If some parameters do not alter by the user, then we use default parameter values for the tools.

3.1. Karect<sup>3</sup> (v1.0, <http://aminallam.github.io/karect/>)

```
karect -correct -threads=${number of threads} -matchtype=edit -celltype=haploid -inputfile=${input file} -resultdir=${result dir}
```

- `matchtype`: is set to "edit" for our datasets is Ion Torrent datasets

- celltype: is set to "haploid" for our samples are hepatitis B virus serum

### 3.2. Fiona<sup>4</sup> (v0.2.4, <http://packages.seqan.de/fiona/>)

fiona -g  $\{\text{genome size}\}$  -nt  $\{\text{number of threads}\}$   $\{\text{input file}\}$   $\{\text{result file}\}$

- $\{\text{genome size}\}$ : the genome size is the size of HBV reverse transcriptase region
- $\{\text{input file}\}$ : the fastq files of our empirical and simulation data, the same as the other tools
- $\{\text{result file}\}$ : specify a result fastq files of our empirical and simulation data, the same as the other tools

### 3.3. Pollux<sup>5</sup> (v1.0.2, <https://github.com/emarinier/pollux>)

pollux -i  $\{\text{input file}\}$  -k  $\{\text{k-mer size}\}$  -o  $\{\text{result dir}\}$

- $\{\text{k-mer size}\}$ : 31

### 3.4. Coral<sup>6</sup> (v1.4.1, <https://www.cs.helsinki.fi/u/lmsalmel/coral/>)

coral -p  $\{\text{number of threads}\}$  -k  $\{\text{k-mer size}\}$  -fq  $\{\text{input file}\}$  -454 -o  $\{\text{result file}\}$ , where  $\{\text{k-mer size}\}$  is 21.

3.5 Blue<sup>7</sup> (v1.1.3, <http://www.bioinformatics.csiro.au/blue>), includes three steps as indicated below:

3.5.1) mono Tessel.exe -k  $\{\text{k-mer size}\}$  -g  $\{\text{genome size}\}$  -t  $\{\text{number of threads}\}$  -f fastq  $\{\text{input file}\}$

3.5.2) mono GenerateMerPairs.exe -t  $\{\text{number of threads}\}$  -m  $\{\text{minimum depth}\}$  ./blue\_temp  $\{\text{result file}\}$

3.5.3) mono Blue.exe -m  $\{\text{k-mer repetition depth}\}$  -t  $\{\text{number of threads}\}$  -hp -good  $\{\%\text{k-mers}\}$  -variable -o  $\{\text{result dir}\}$  ./blue\_temp  $\{\text{result file}\}$

- $\{\text{k-mer size}\}$ : 21
- $\{\text{minimum depth}\}$ : the minimum depth needed before a k-mer will be loaded into the k-mers table (setting to 10)
- $\{\text{k-mer repetition depth}\}$ : a k-mer repetition depth used to distinguish between 'good' and 'bad' k-mers (setting to 50)

- $\{\%k\text{-mers}\}$ : keeps reads that look to be 'good' after correction (setting to 80).

### 3.6 Pollux\_indel and Fiona (pollux\_fiona)

#### 3.6.1) Pollux for indel error correction only

```
pollux -s false -n true -d true -h true -i  $\{\text{input file}\}$  -k  $\{k\text{-mer size}\}$  -o  $\{\text{result dir}\}$ 
```

- $\{-s\ \text{false}\}$ : substitution correction is false
- $\{-n\ \text{true}\}$ : insertion corrections is true
- $\{-d\ \text{true}\}$ : deletion corrections is true
- $\{k\text{-mer size}\}$ : 31

#### 3.6.2) Fiona for residual indel and substitution error correction

```
fiona -g  $\{\text{genome size}\}$  -nt  $\{\text{number of threads}\}$   $\{\text{input file}\}$   $\{\text{result file}\}$ 
```

- $\{\text{genome size}\}$ : the genome size is the size of HBV reverse transcriptase region
- $\{\text{input file}\}$ : the fastq files is corrected only indels by Pollux
- $\{\text{result file}\}$ : specify a result fastq files of data

4. Optimization of Error correction parameter optimization. We tested whether the error-correction performance was associated with the value of  $k$ -mer (10, 21, and 31, respectively) for the methods of blue, pollux, and coral.

### 5. Error correction evaluation

The measure of gain, TP, FP, and FN were calculated using the 'compute-stats.py' script from the ECE Toolkit (<http://aluru-sun.ece.iastate.edu/doku.php?id=ecr>)<sup>1</sup>. In the calculation of TN, the count of the total bases from a fastq file was calculated using *readfq* (<https://github.com/lh3/readfq>).

```
python compute-stats.py -a  $\{\text{pre-correction alignment-sam file}\}$  -m  $\{\text{after-correction alignment-sam file}\}$  -o  $\{\text{stats-output-file}\}$  -r  $\{\text{number of reads}\}$  -g  $\{\text{genome reference}\}$ 
```

## Supplementary tables

Table S1. The number of quality-trimmed reads and reads corrected by different algorithms

| ID   | Quality       |        |        |        |        |        |              |
|------|---------------|--------|--------|--------|--------|--------|--------------|
|      | trimmed reads | pollux | blue   | fiona  | coral  | karect | pollux_fiona |
| 009  | 59,692        | 59,473 | 54,270 | 59,692 | 59,692 | 59,692 | 59,470       |
| 014  | 52,039        | 51,786 | 45,651 | 52,039 | 52,039 | 52,039 | 51,813       |
| 017  | 61,174        | 60,890 | 55,040 | 61,174 | 61,174 | 61,174 | 60,886       |
| 020  | 42,097        | 41,921 | 36,630 | 42,097 | 42,097 | 42,097 | 41,915       |
| 024  | 56,729        | 56,500 | 51,008 | 56,729 | 56,729 | 56,729 | 56,499       |
| 033  | 55,425        | 55,199 | 48,818 | 55,425 | 55,425 | 55,425 | 55,197       |
| 037  | 39,971        | 39,879 | 32,630 | 39,971 | 39,971 | 39,971 | 39,871       |
| 040  | 35,191        | 35,100 | 30,938 | 35,191 | 35,191 | 35,191 | 35,101       |
| 042  | 41,108        | 41,053 | 37,671 | 41,108 | 41,108 | 41,108 | 41,051       |
| 1005 | 40,081        | 39,951 | 38,704 | 40,081 | 40,081 | 40,081 | 39,950       |
| 1009 | 32,042        | 31,879 | 30,321 | 32,042 | 32,042 | 32,042 | 31,875       |
| 1014 | 36,652        | 36,556 | 35,771 | 36,652 | 36,652 | 36,652 | 36,558       |
| 1019 | 44,490        | 44,293 | 41,396 | 44,490 | 44,490 | 44,490 | 44,290       |
| 1024 | 57,965        | 57,555 | 55,124 | 57,965 | 57,965 | 57,965 | 57,562       |
| 1028 | 32,852        | 32,398 | 30,982 | 32,852 | 32,852 | 32,852 | 32,397       |
| 1034 | 42,626        | 42,500 | 40,545 | 42,626 | 42,626 | 42,626 | 42,500       |
| 1038 | 49,963        | 49,716 | 47,551 | 49,963 | 49,963 | 49,963 | 49,714       |
| 1041 | 40,300        | 39,843 | 37,185 | 40,300 | 40,300 | 40,300 | 39,840       |
| 1046 | 59,393        | 59,127 | 56,684 | 59,393 | 59,393 | 59,393 | 59,127       |

Table S2. The error rates (%) in the raw, quality-trimmed, and reads after error correction by different algorithms

| ID   | Raw    | Quality |        | pollux | blue   | fiona  | coral  | karect | pollux_fiona |
|------|--------|---------|--------|--------|--------|--------|--------|--------|--------------|
|      | reads  | trimmed | reads  |        |        |        |        |        |              |
| 009  | 0.6829 | 0.5160  | 0.0431 | 0.0503 | 0.2937 | 0.3352 | 0.4591 | 0.0198 |              |
| 014  | 0.7820 | 0.6150  | 0.1325 | 0.1089 | 0.4019 | 0.4136 | 0.5886 | 0.0986 |              |
| 017  | 0.6510 | 0.4960  | 0.0258 | 0.0607 | 0.2861 | 0.2963 | 0.4352 | 0.0065 |              |
| 020  | 0.8365 | 0.6229  | 0.0906 | 0.0527 | 0.3735 | 0.4127 | 0.5778 | 0.0611 |              |
| 024  | 0.7073 | 0.5369  | 0.0258 | 0.0548 | 0.3134 | 0.3278 | 0.4754 | 0.0102 |              |
| 033  | 0.7786 | 0.6031  | 0.0178 | 0.1370 | 0.3657 | 0.3584 | 0.5409 | 0.0036 |              |
| 037  | 0.7859 | 0.6099  | 0.0296 | 0.0776 | 0.3242 | 0.3427 | 0.5345 | 0.0137 |              |
| 040  | 0.7898 | 0.6135  | 0.0291 | 0.0558 | 0.3301 | 0.3634 | 0.5511 | 0.0101 |              |
| 042  | 0.7435 | 0.5558  | 0.0414 | 0.0632 | 0.2861 | 0.3088 | 0.4884 | 0.0234 |              |
| 1005 | 0.5131 | 0.4176  | 0.0396 | 0.0013 | 0.2032 | 0.2466 | 0.3555 | 0.0177 |              |
| 1009 | 0.5989 | 0.4937  | 0.0294 | 0.0011 | 0.2668 | 0.3374 | 0.4186 | 0.0114 |              |
| 1014 | 0.4374 | 0.3532  | 0.0209 | 0.0005 | 0.1577 | 0.2107 | 0.2933 | 0.0058 |              |
| 1019 | 0.4534 | 0.3681  | 0.0220 | 0.0012 | 0.1717 | 0.2344 | 0.2983 | 0.0059 |              |
| 1024 | 0.4443 | 0.3619  | 0.0200 | 0.0025 | 0.1897 | 0.2472 | 0.3151 | 0.0031 |              |
| 1028 | 0.4969 | 0.4146  | 0.0260 | 0.0011 | 0.2339 | 0.2898 | 0.3501 | 0.0104 |              |
| 1034 | 0.4152 | 0.3394  | 0.0399 | 0.0028 | 0.1581 | 0.2243 | 0.2852 | 0.0134 |              |
| 1038 | 0.4795 | 0.3931  | 0.1293 | 0.0237 | 0.2237 | 0.2596 | 0.3375 | 0.0857 |              |
| 1041 | 0.5087 | 0.4229  | 0.0696 | 0.0275 | 0.2345 | 0.2726 | 0.3657 | 0.0496 |              |
| 1046 | 0.4899 | 0.4099  | 0.0318 | 0.0029 | 0.2210 | 0.2540 | 0.3573 | 0.0164 |              |

Table S3. The proportion of the remained errors and mutated alleles after error-correction in simulated data with known variants.

|                        | Pollux (%) | Blue (%)  | Fiona (%)   | Coral (%)  | Karect (%)  |
|------------------------|------------|-----------|-------------|------------|-------------|
| Substitution errors    | 0.17±0.09  | 0.53±0.83 | 0.13±0.28   | 80.56±3.27 | 77.94±18.07 |
| Rare variants          | 0.00±0.00  | 1.18±1.42 | 0.00±0.00   | 94.61±9.18 | 89.65±17.83 |
| Low-frequency variants | 0.03±0.05  | 2.85±0.33 | 100.06±0.11 | 72.30±4.87 | 99.35±0.34  |

Values are mean±sd. The number of mutated bases at a given position was extracted from TEF files. The error-corrected reads have a higher mapping rate, leading to >100% identification of mutated alleles (e.g., fiona).

Table S4. Error rates in the model 1 (a fixed substitution error rate and read number, and varied indels rates). We used a substitution error rate of 0.16985% from Laehnemann et al.<sup>8</sup>. The deletion error rate is 1.5 times of the insertion rate.

| Insertion | Deletion | Substitution | Total |
|-----------|----------|--------------|-------|
| 0.01      | 0.015    | 0.17         | 0.195 |
| 0.02      | 0.030    | 0.17         | 0.220 |
| 0.03      | 0.045    | 0.17         | 0.245 |
| 0.04      | 0.060    | 0.17         | 0.270 |
| 0.05      | 0.075    | 0.17         | 0.295 |
| 0.06      | 0.090    | 0.17         | 0.320 |
| 0.07      | 0.105    | 0.17         | 0.345 |
| 0.08      | 0.120    | 0.17         | 0.370 |



Table S5. Error rates in the model 2 (fixed indels error rates and read number, and varied substitution rates).

| Insertion | Deletion | Substitution | Total |
|-----------|----------|--------------|-------|
| 0.04      | 0.06     | 0.00         | 0.10  |
| 0.04      | 0.06     | 0.10         | 0.20  |
| 0.04      | 0.06     | 0.20         | 0.30  |
| 0.04      | 0.06     | 0.30         | 0.40  |
| 0.04      | 0.06     | 0.40         | 0.50  |
| 0.04      | 0.06     | 0.50         | 0.60  |
| 0.04      | 0.06     | 0.60         | 0.70  |
| 0.04      | 0.06     | 0.70         | 0.80  |

Table S6. Number of reads in the model 3 with a fixed substitution (0.17%) and fixed insertion and deletion (0.04% and 0.06%) error rate

| Number of Read | Coverage |
|----------------|----------|
| 6,000          | 1,230    |
| 8,000          | 1,650    |
| 10,000         | 2,050    |
| 20,000         | 4,100    |
| 40,000         | 8,200    |
| 60,000         | 12,300   |

## Supplementary Figures

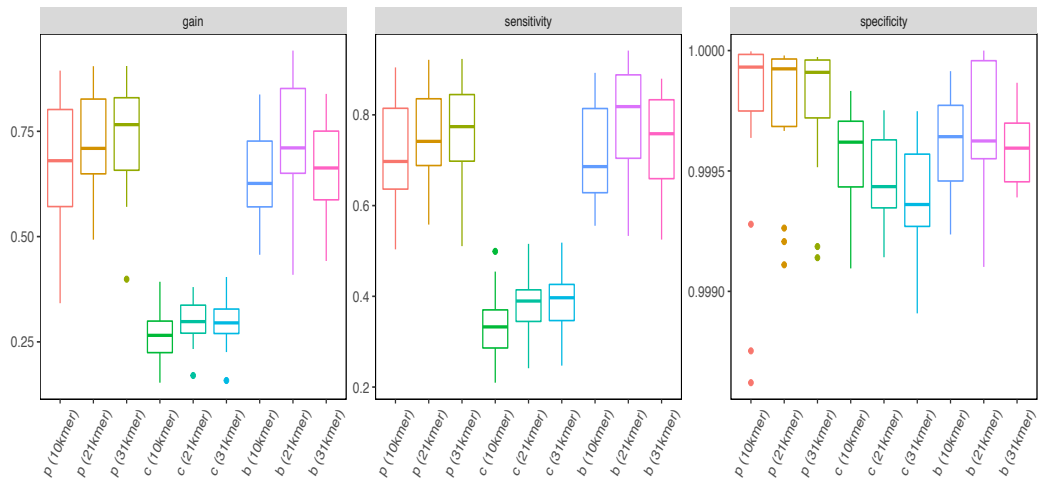

Fig. S1. The performance of different  $k$ -mer parameters for error-correction in the methods of pollux, coral and blue. (a). The measure of gain, (b). The sensitivity, and (c). The specificity. (p: pollux; b: blue; c: coral)

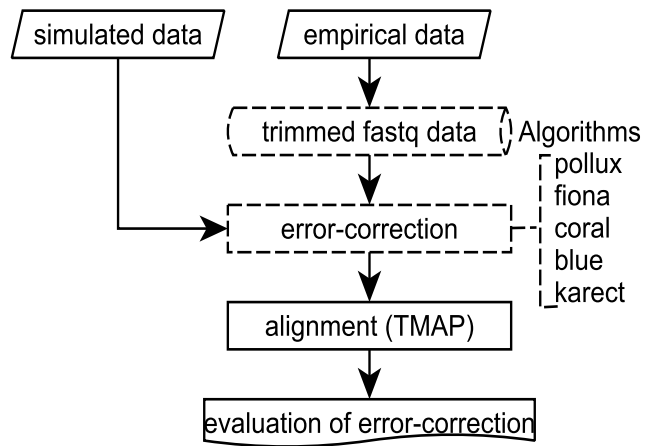

Fig. S2. A pipeline to process the empirical or simulated PGM data, including pre-processing, error correction, alignment, and assessment of error correction.

## References

1. Yang, X., Chockalingam, S. P. & Aluru, S. A survey of error-correction methods for next-generation sequencing. *Briefings in bioinformatics* **14**, 56–66 (2013).
2. Caboche, S., Audebert, C., Lemoine, Y. & Hot, D. Comparison of mapping algorithms used in high-throughput sequencing: application to Ion Torrent data. *BMC Genomics* **15**, 1 (2014).
3. Allam, A., Kalnis, P. & Solovyev, V. Karect: accurate correction of substitution, insertion and deletion errors for next-generation sequencing data. *Bioinformatics* **31**, 3421–3428 (2015).
4. Schulz, M. H. *et al.* Fiona: a parallel and automatic strategy for read error correction. *Bioinformatics* **30**, i356–i363 (2014).
5. Marinier, E., Brown, D. G. & McConkey, B. J. Pollux: platform independent error correction of single and mixed genomes. *BMC Bioinformatics* **16**, 10 (2015).
6. Salmela, L. & Schröder, J. Correcting errors in short reads by multiple alignments. *Bioinformatics* **27**, 1455–1461 (2011).
7. Greenfield, P., Duesing, K., Papanicolaou, A. & Bauer, D. C. Blue: correcting sequencing errors using consensus and context. *Bioinformatics (2014)* **30**, 2723–2732 (2014).
8. Laehnemann, D., Borkhardt, A. & McHardy, A. C. Denoising DNA deep sequencing data-high-throughput sequencing errors and their correction. *Briefings in bioinformatics* bbv029 (2015).
